# Supplementary material for: Type 2 diabetes, socioeconomic status and life expectancy in Scotland (2012–2014): a population-based observational study
Source: Springer Nature journal article supplement (doi:10.1007/s00125-017-4478-x), 2017-10-26
Supplement: MOESM1 [file 15166798]

ESM Table 1

Abridged life table for men and women with type 2 diabetes vs. population of Scotland without type 2 diabetes; SIMD quintile 1 (most deprived), period 2012-2014

| age interval<br>(years) | observed data in type 2 diabetes cohort |        |                             | observed data in type 2 diabetes-free population |        |                             | estimated life expectancy (95% confidence interval) |                                    |                            |
|-------------------------|-----------------------------------------|--------|-----------------------------|--------------------------------------------------|--------|-----------------------------|-----------------------------------------------------|------------------------------------|----------------------------|
|                         | person-years                            | deaths | death rate<br>per 1,000 p-y | person-years                                     | deaths | death rate per<br>1,000 p-y | type 2 diabetes<br>cohort                           | type 2 diabetes-free<br>population | LE difference <sup>a</sup> |
| MEN                     |                                         |        |                             |                                                  |        |                             |                                                     |                                    |                            |
| 40-44                   | 3,863.3                                 | 29     | 7.5                         | 101,217.7                                        | 523    | 5.2                         | 32.2 (31.5, 32.8)                                   | 34.7 (34.5, 34.8)                  | -2.5 (-3.1, -1.9)          |
| 45-49                   | 6,674.1                                 | 46     | 6.9                         | 106,663.9                                        | 669    | 6.3                         | 28.3 (27.8, 28.8)                                   | 30.5 (30.3, 30.7)                  | -2.2 (-2.7, -1.7)          |
| 50-54                   | 9,888.4                                 | 107    | 10.8                        | 97,830.6                                         | 825    | 8.4                         | 24.2 (23.8, 24.6)                                   | 26.4 (26.2, 26.6)                  | -2.2 (-2.6, -1.8)          |
| 55-59                   | 11,928.5                                | 190    | 15.9                        | 80,310.5                                         | 1,002  | 12.5                        | 20.4 (20.0, 20.8)                                   | 22.4 (22.2, 22.6)                  | -2.0 (-2.4, -1.6)          |
| 60-64                   | 12,844.0                                | 329    | 25.6                        | 68,876.0                                         | 1,304  | 18.9                        | 16.9 (16.6, 17.2)                                   | 18.7 (18.5, 18.9)                  | -1.8 (-2.2, -1.4)          |
| 65-69                   | 13,429.2                                | 473    | 35.2                        | 58,620.8                                         | 1,625  | 27.7                        | 13.9 (13.6, 14.1)                                   | 15.3 (15.2, 15.5)                  | -1.4 (-1.7, -1.1)          |
| 70-74                   | 11,648.9                                | 643    | 55.2                        | 43,153.1                                         | 1,853  | 42.9                        | 11.0 (10.8, 11.3)                                   | 12.2 (12.1, 12.4)                  | -1.2 (-1.5, -0.9)          |
| 75-79                   | 9,511.6                                 | 756    | 79.5                        | 32,407.4                                         | 2,085  | 64.3                        | 8.8 (8.5, 9.0)                                      | 9.5 (9.4, 9.7)                     | -0.7 (-1.0, -0.4)          |
| 80-84                   | 5,488.8                                 | 629    | 114.6                       | 21,123.2                                         | 2,051  | 97.1                        | 6.9 (6.6, 7.2)                                      | 7.2 (7.1, 7.4)                     | -0.3 (-0.6, -0.0)          |
| 85-89                   | 2,166.1                                 | 353    | 163.0                       | 10,073.9                                         | 1,685  | 167.3                       | 5.4 (5.2, 5.7)                                      | 5.3 (5.2, 5.4)                     | 0.1 (-0.2, 0.4)            |
| WOMEN                   |                                         |        |                             |                                                  |        |                             |                                                     |                                    |                            |
| 40-44                   | 3,037.9                                 | 11     | 3.6                         | 111,048.1                                        | 272    | 2.4                         | 34.8 (34.2, 35.4)                                   | 39.3 (39.1, 39.5)                  | -4.5 (-5.2, -3.8)          |
| 45-49                   | 5,153.0                                 | 32     | 6.2                         | 116,164.0                                        | 379    | 3.3                         | 30.4 (29.8, 30.9)                                   | 34.7 (34.6, 34.9)                  | -4.3 (-4.9, -3.7)          |
| 50-54                   | 7,171.1                                 | 72     | 10.0                        | 106,848.9                                        | 518    | 4.8                         | 26.3 (25.8, 26.7)                                   | 30.3 (30.1, 30.4)                  | -4.0 (-4.5, -3.5)          |
| 55-59                   | 8,862.6                                 | 96     | 10.8                        | 89,301.4                                         | 696    | 7.8                         | 22.5 (22.1, 22.9)                                   | 26.0 (25.8, 26.1)                  | -3.5 (-3.9, -3.1)          |
| 60-64                   | 9,851.9                                 | 182    | 18.5                        | 75,593.1                                         | 887    | 11.7                        | 18.6 (18.2, 19.0)                                   | 21.9 (21.7, 22.0)                  | -3.3 (-3.7, -2.9)          |
| 65-69                   | 10,810.7                                | 338    | 31.3                        | 67,723.3                                         | 1,188  | 17.5                        | 15.2 (14.8, 15.5)                                   | 18.1 (17.9, 18.2)                  | -2.9 (-3.2, -2.6)          |
| 70-74                   | 11,356.3                                | 473    | 41.7                        | 56,889.7                                         | 1,564  | 27.5                        | 12.3 (12.0, 12.6)                                   | 14.5 (14.4, 14.6)                  | -2.2 (-2.5, -1.9)          |
| 75-79                   | 10,956.7                                | 710    | 64.8                        | 49,068.3                                         | 2,240  | 45.7                        | 9.6 (9.4, 9.8)                                      | 11.3 (11.1, 11.4)                  | -1.7 (-2.0, -1.4)          |
| 80-84                   | 7,686.6                                 | 732    | 95.2                        | 37,434.4                                         | 2,744  | 73.3                        | 7.3 (7.1, 7.5)                                      | 8.5 (8.4, 8.6)                     | -1.2 (-1.4, -1.0)          |
| 85-89                   | 3,661.7                                 | 570    | 155.7                       | 21,921.3                                         | 2,734  | 124.7                       | 5.3 (5.1, 5.5)                                      | 6.2 (6.1, 6.3)                     | -0.9 (-1.1, -0.7)          |

<sup>a</sup> Difference calculated as (type 2 diabetes cohort life expectancy minus type 2 diabetes-free population life expectancy); negative values indicate lower life expectancy in type 2 diabetes cohort.

ESM Table 2

Abridged life table for men and women with type 2 diabetes vs. population of Scotland without type 2 diabetes; SIMD quintile 2, period 2012-2014

| age interval<br>(years) | observed data in type 2 diabetes cohort |        |                             | observed data in type 2 diabetes-free population |        |                             | estimated life expectancy (95% confidence interval) |                                    |                            |
|-------------------------|-----------------------------------------|--------|-----------------------------|--------------------------------------------------|--------|-----------------------------|-----------------------------------------------------|------------------------------------|----------------------------|
|                         | person-years                            | deaths | death rate<br>per 1,000 p-y | person-years                                     | deaths | death rate per<br>1,000 p-y | type 2 diabetes<br>cohort                           | type 2 diabetes-free<br>population | LE difference <sup>a</sup> |
| MEN                     |                                         |        |                             |                                                  |        |                             |                                                     |                                    |                            |
| 40-44                   | 3,123.0                                 | 12     | 3.8                         | 102,707.0                                        | 312    | 3.0                         | 35.0 (34.4, 35.6)                                   | 37.8 (37.6, 38.0)                  | -2.8 (-3.4, -2.2)          |
| 45-49                   | 5,720.1                                 | 24     | 4.2                         | 107,585.9                                        | 441    | 4.1                         | 30.6 (30.2, 31.1)                                   | 33.3 (33.2, 33.5)                  | -2.7 (-3.2, -2.2)          |
| 50-54                   | 8,535.9                                 | 77     | 9.0                         | 101,610.1                                        | 534    | 5.3                         | 26.2 (25.8, 26.7)                                   | 29.0 (28.8, 29.1)                  | -2.8 (-3.3, -2.3)          |
| 55-59                   | 10,737.6                                | 136    | 12.7                        | 86,929.4                                         | 777    | 8.9                         | 22.3 (22.0, 22.7)                                   | 24.7 (24.5, 24.8)                  | -2.4 (-2.8, -2.0)          |
| 60-64                   | 12,829.1                                | 213    | 16.6                        | 77,059.0                                         | 989    | 12.8                        | 18.6 (18.3, 18.9)                                   | 20.7 (20.5, 20.8)                  | -2.1 (-2.4, -1.8)          |
| 65-69                   | 14,159.6                                | 364    | 25.7                        | 69,092.4                                         | 1,430  | 20.7                        | 15.0 (14.8, 15.3)                                   | 16.9 (16.7, 17.0)                  | -1.9 (-2.2, -1.6)          |
| 70-74                   | 12,414.7                                | 554    | 44.6                        | 50,090.3                                         | 1,671  | 33.4                        | 11.8 (11.5, 12.0)                                   | 13.5 (13.3, 13.6)                  | -1.7 (-2.0, -1.4)          |
| 75-79                   | 10,279.6                                | 704    | 68.5                        | 38,548.4                                         | 1,962  | 50.9                        | 9.1 (8.8, 9.3)                                      | 10.5 (10.3, 10.6)                  | -1.4 (-1.7, -1.1)          |
| 80-84                   | 6,306.9                                 | 706    | 111.9                       | 25,390.2                                         | 2,135  | 84.1                        | 6.8 (6.6, 7.0)                                      | 7.8 (7.7, 7.9)                     | -1.0 (-1.3, -0.7)          |
| 85-89                   | 2,682.1                                 | 443    | 165.2                       | 12,937.9                                         | 1,882  | 145.5                       | 5.1 (4.9, 5.4)                                      | 5.6 (5.5, 5.7)                     | -0.5 (-0.7, -0.3)          |
| WOMEN                   |                                         |        |                             |                                                  |        |                             |                                                     |                                    |                            |
| 40-44                   | 2,321.0                                 | 8      | 3.4                         | 109,434.0                                        | 196    | 1.8                         | 36.0 (35.3, 36.7)                                   | 41.5 (41.3, 41.6)                  | -5.5 (-6.2, -4.8)          |
| 45-49                   | 3,729.8                                 | 21     | 5.6                         | 116,186.2                                        | 280    | 2.4                         | 31.6 (31.0, 32.2)                                   | 36.8 (36.7, 37.0)                  | -5.2 (-5.8, -4.6)          |
| 50-54                   | 5,621.4                                 | 48     | 8.5                         | 110,818.6                                        | 396    | 3.6                         | 27.4 (26.9, 27.9)                                   | 32.2 (32.1, 32.4)                  | -4.8 (-5.3, -4.3)          |
| 55-59                   | 7,468.5                                 | 85     | 11.4                        | 95,488.5                                         | 536    | 5.6                         | 23.5 (23.1, 23.9)                                   | 27.8 (27.6, 27.9)                  | -4.3 (-4.8, -3.8)          |
| 60-64                   | 9,029.3                                 | 148    | 16.4                        | 86,690.7                                         | 731    | 8.4                         | 19.7 (19.4, 20.1)                                   | 23.5 (23.3, 23.6)                  | -3.8 (-4.2, -3.4)          |
| 65-69                   | 10,875.2                                | 269    | 24.7                        | 80,618.8                                         | 1,079  | 13.4                        | 16.2 (15.9, 16.5)                                   | 19.4 (19.3, 19.5)                  | -3.2 (-3.5, -2.9)          |
| 70-74                   | 11,048.8                                | 415    | 37.6                        | 64,305.2                                         | 1,448  | 22.5                        | 13.0 (12.7, 13.3)                                   | 15.6 (15.4, 15.7)                  | -2.6 (-2.9, -2.3)          |
| 75-79                   | 10,758.2                                | 614    | 57.1                        | 56,316.8                                         | 2,046  | 36.3                        | 10.2 (9.9, 10.4)                                    | 12.1 (12.0, 12.2)                  | -1.9 (-2.2, -1.6)          |
| 80-84                   | 7,943.3                                 | 711    | 89.5                        | 42,955.7                                         | 2,743  | 63.9                        | 7.7 (7.5, 7.9)                                      | 9.0 (8.9, 9.1)                     | -1.3 (-1.5, -1.1)          |
| 85-89                   | 4,153.3                                 | 572    | 137.7                       | 26,697.7                                         | 3,023  | 113.2                       | 5.7 (5.6, 5.9)                                      | 6.5 (6.4, 6.6)                     | -0.8 (-1.0, -0.6)          |

<sup>a</sup> Difference calculated as (type 2 diabetes cohort life expectancy minus type 2 diabetes-free population life expectancy); negative values indicate lower life expectancy in type 2 diabetes cohort.

ESM Table 3

Abridged life table for men and women with type 2 diabetes vs. population of Scotland without type 2 diabetes; SIMD quintile 3, period 2012-2014

| age interval<br>(years) | observed data in type 2 diabetes cohort |        |                             | observed data in type 2 diabetes-free population |        |                             | estimated life expectancy (95% confidence interval) |                                    |                            |
|-------------------------|-----------------------------------------|--------|-----------------------------|--------------------------------------------------|--------|-----------------------------|-----------------------------------------------------|------------------------------------|----------------------------|
|                         | person-years                            | deaths | death rate<br>per 1,000 p-y | person-years                                     | deaths | death rate per<br>1,000 p-y | type 2 diabetes<br>cohort                           | type 2 diabetes-free<br>population | LE difference <sup>a</sup> |
| MEN                     |                                         |        |                             |                                                  |        |                             |                                                     |                                    |                            |
| 40-44                   | 2,455.8                                 | 12     | 4.9                         | 107,576.2                                        | 234    | 2.2                         | 36.1 (35.4, 36.8)                                   | 39.8 (39.6, 39.9)                  | -3.7 (-4.4, -3.0)          |
| 45-49                   | 4,601.7                                 | 20     | 4.3                         | 116,446.3                                        | 286    | 2.5                         | 32.0 (31.4, 32.5)                                   | 35.2 (35.0, 35.3)                  | -3.2 (-3.7, -2.7)          |
| 50-54                   | 7,169.5                                 | 42     | 5.9                         | 109,923.6                                        | 485    | 4.4                         | 27.6 (27.2, 28.0)                                   | 30.6 (30.4, 30.7)                  | -3.0 (-3.5, -2.5)          |
| 55-59                   | 9,505.2                                 | 104    | 10.9                        | 94,466.8                                         | 590    | 6.2                         | 23.4 (23.0, 23.7)                                   | 26.2 (26.0, 26.4)                  | -2.8 (-3.2, -2.4)          |
| 60-64                   | 11,954.4                                | 204    | 17.1                        | 85,436.6                                         | 836    | 9.8                         | 19.5 (19.2, 19.9)                                   | 22.0 (21.8, 22.1)                  | -2.5 (-2.9, -2.1)          |
| 65-69                   | 13,733.6                                | 296    | 21.6                        | 77,613.4                                         | 1,253  | 16.1                        | 16.0 (15.7, 16.3)                                   | 17.9 (17.8, 18.1)                  | -1.9 (-2.2, -1.6)          |
| 70-74                   | 11,827.3                                | 446    | 37.7                        | 54,955.7                                         | 1,492  | 27.1                        | 12.6 (12.3, 12.9)                                   | 14.2 (14.1, 14.4)                  | -1.6 (-1.9, -1.3)          |
| 75-79                   | 10,014.0                                | 600    | 59.9                        | 41,093.0                                         | 1,911  | 46.5                        | 9.7 (9.4, 9.9)                                      | 10.9 (10.8, 11.1)                  | -1.2 (-1.5, -0.9)          |
| 80-84                   | 6,346.9                                 | 603    | 95.0                        | 26,556.1                                         | 2,028  | 76.4                        | 7.2 (7.0, 7.4)                                      | 8.2 (8.0, 8.3)                     | -1.0 (-1.3, -0.7)          |
| 85-89                   | 2,639.7                                 | 440    | 166.7                       | 13,567.3                                         | 1,777  | 131.0                       | 5.2 (4.9, 5.4)                                      | 5.8 (5.7, 5.9)                     | -0.6 (-0.9, -0.3)          |
| WOMEN                   |                                         |        |                             |                                                  |        |                             |                                                     |                                    |                            |
| 40-44                   | 1,705.4                                 | 4      | 2.3                         | 113,476.6                                        | 127    | 1.1                         | 38.3 (37.6, 39.0)                                   | 43.3 (43.1, 43.5)                  | -5.0 (-5.7, -4.3)          |
| 45-49                   | 3,098.3                                 | 7      | 2.3                         | 122,792.7                                        | 226    | 1.8                         | 33.7 (33.1, 34.3)                                   | 38.5 (38.4, 38.7)                  | -4.8 (-5.4, -4.2)          |
| 50-54                   | 4,743.7                                 | 27     | 5.7                         | 116,178.3                                        | 322    | 2.8                         | 29.1 (28.5, 29.6)                                   | 33.9 (33.7, 34.0)                  | -4.8 (-5.4, -4.2)          |
| 55-59                   | 6,099.5                                 | 59     | 9.7                         | 102,061.5                                        | 408    | 4.0                         | 24.8 (24.4, 25.3)                                   | 29.3 (29.2, 29.5)                  | -4.5 (-5.0, -4.0)          |
| 60-64                   | 7,544.7                                 | 94     | 12.5                        | 93,757.3                                         | 607    | 6.5                         | 20.9 (20.5, 21.3)                                   | 24.9 (24.7, 25.0)                  | -4.0 (-4.4, -3.6)          |
| 65-69                   | 8,971.1                                 | 180    | 20.1                        | 87,956.9                                         | 855    | 9.7                         | 17.1 (16.8, 17.5)                                   | 20.6 (20.5, 20.7)                  | -3.5 (-3.9, -3.1)          |
| 70-74                   | 9,457.6                                 | 298    | 31.5                        | 67,230.4                                         | 1,177  | 17.5                        | 13.7 (13.4, 14.0)                                   | 16.5 (16.4, 16.6)                  | -2.8 (-3.1, -2.5)          |
| 75-79                   | 8,867.6                                 | 486    | 54.8                        | 53,878.4                                         | 1,602  | 29.7                        | 10.6 (10.3, 10.8)                                   | 12.8 (12.7, 12.9)                  | -2.2 (-2.5, -1.9)          |
| 80-84                   | 6,676.3                                 | 538    | 80.6                        | 40,816.7                                         | 2,356  | 57.7                        | 8.1 (7.9, 8.4)                                      | 9.4 (9.3, 9.5)                     | -1.3 (-1.6, -1.0)          |
| 85-89                   | 3,797.8                                 | 504    | 132.7                       | 25,738.2                                         | 2,670  | 103.7                       | 6.0 (5.8, 6.2)                                      | 6.7 (6.7, 6.8)                     | -0.7 (-0.9, -0.5)          |

<sup>a</sup> Difference calculated as (type 2 diabetes cohort life expectancy minus type 2 diabetes-free population life expectancy); negative values indicate lower life expectancy in type 2 diabetes cohort.

ESM Table 4

Abridged life table for men and women with type 2 diabetes vs. population of Scotland without type 2 diabetes; SIMD quintile 4, period 2012-2014

| age interval<br>(years) | observed data in type 2 diabetes cohort |        |                             | observed data in type 2 diabetes-free population |        |                             | estimated life expectancy (95% confidence interval) |                                    |                            |
|-------------------------|-----------------------------------------|--------|-----------------------------|--------------------------------------------------|--------|-----------------------------|-----------------------------------------------------|------------------------------------|----------------------------|
|                         | person-years                            | deaths | death rate<br>per 1,000 p-y | person-years                                     | deaths | death rate per<br>1,000 p-y | type 2 diabetes<br>cohort                           | type 2 diabetes-free<br>population | LE difference <sup>a</sup> |
| MEN                     |                                         |        |                             |                                                  |        |                             |                                                     |                                    |                            |
| 40-44                   | 1,962.1                                 | 7      | 3.6                         | 111,406.9                                        | 139    | 1.2                         | 37.0 (36.2, 37.7)                                   | 41.5 (41.4, 41.7)                  | -4.5 (-5.2, -3.8)          |
| 45-49                   | 3,857.0                                 | 18     | 4.7                         | 121,384.0                                        | 248    | 2.0                         | 32.6 (32.0, 33.1)                                   | 36.8 (36.6, 36.9)                  | -4.2 (-4.8, -3.6)          |
| 50-54                   | 6,183.7                                 | 42     | 6.8                         | 115,246.3                                        | 316    | 2.7                         | 28.3 (27.8, 28.7)                                   | 32.1 (32.0, 32.3)                  | -3.8 (-4.3, -3.3)          |
| 55-59                   | 8,739.7                                 | 90     | 10.3                        | 100,259.3                                        | 490    | 4.9                         | 24.2 (23.8, 24.6)                                   | 27.5 (27.4, 27.7)                  | -3.3 (-3.7, -2.9)          |
| 60-64                   | 11,206.9                                | 132    | 11.8                        | 90,043.1                                         | 696    | 7.7                         | 20.3 (20.0, 20.7)                                   | 23.1 (23.0, 23.3)                  | -2.8 (-3.2, -2.4)          |
| 65-69                   | 13,034.7                                | 244    | 18.7                        | 80,299.3                                         | 1,032  | 12.9                        | 16.4 (16.1, 16.7)                                   | 19.0 (18.8, 19.1)                  | -2.6 (-2.9, -2.3)          |
| 70-74                   | 10,935.6                                | 384    | 35.1                        | 55,600.4                                         | 1,209  | 21.7                        | 12.8 (12.5, 13.0)                                   | 15.1 (14.9, 15.2)                  | -2.3 (-2.6, -2.0)          |
| 75-79                   | 9,337.0                                 | 532    | 57.0                        | 41,055.0                                         | 1,523  | 37.1                        | 9.7 (9.5, 10.0)                                     | 11.5 (11.4, 11.6)                  | -1.8 (-2.1, -1.5)          |
| 80-84                   | 6,224.0                                 | 604    | 97.0                        | 27,202.0                                         | 1,906  | 70.1                        | 7.1 (6.9, 7.4)                                      | 8.3 (8.2, 8.5)                     | -1.2 (-1.5, -0.9)          |
| 85-89                   | 2,696.3                                 | 464    | 172.1                       | 13,567.7                                         | 1,833  | 135.1                       | 5.1 (4.9, 5.3)                                      | 5.8 (5.7, 5.9)                     | -0.7 (-1.0, -0.4)          |
| WOMEN                   |                                         |        |                             |                                                  |        |                             |                                                     |                                    |                            |
| 40-44                   | 1,227.4                                 | 5      | 4.1                         | 119,229.6                                        | 110    | 0.9                         | 39.4 (38.5, 40.4)                                   | 44.0 (43.8, 44.2)                  | -4.6 (-5.5, -3.7)          |
| 45-49                   | 2,362.0                                 | 7      | 3.0                         | 129,753.0                                        | 168    | 1.3                         | 35.2 (34.5, 35.9)                                   | 39.2 (39.0, 39.3)                  | -4.0 (-4.7, -3.3)          |
| 50-54                   | 3,649.9                                 | 15     | 4.1                         | 122,052.1                                        | 281    | 2.3                         | 30.7 (30.1, 31.2)                                   | 34.4 (34.3, 34.6)                  | -3.7 (-4.3, -3.1)          |
| 55-59                   | 5,096.7                                 | 37     | 7.3                         | 107,220.3                                        | 374    | 3.5                         | 26.3 (25.8, 26.8)                                   | 29.8 (29.6, 29.9)                  | -3.5 (-4.0, -3.0)          |
| 60-64                   | 6,651.2                                 | 61     | 9.2                         | 98,186.8                                         | 547    | 5.6                         | 22.2 (21.7, 22.6)                                   | 25.3 (25.1, 25.4)                  | -3.1 (-3.5, -2.7)          |
| 65-69                   | 7,656.9                                 | 124    | 16.2                        | 90,255.1                                         | 765    | 8.5                         | 18.1 (17.7, 18.4)                                   | 20.9 (20.8, 21.0)                  | -2.8 (-3.2, -2.4)          |
| 70-74                   | 8,002.6                                 | 197    | 24.6                        | 66,256.4                                         | 1,017  | 15.3                        | 14.4 (14.1, 14.7)                                   | 16.7 (16.6, 16.8)                  | -2.3 (-2.6, -2.0)          |
| 75-79                   | 8,128.1                                 | 359    | 44.2                        | 52,953.9                                         | 1,460  | 27.6                        | 10.9 (10.7, 11.2)                                   | 12.8 (12.7, 13.0)                  | -1.9 (-2.2, -1.6)          |
| 80-84                   | 6,287.2                                 | 475    | 75.6                        | 39,938.8                                         | 2,202  | 55.1                        | 8.0 (7.8, 8.3)                                      | 9.4 (9.3, 9.5)                     | -1.4 (-1.7, -1.1)          |
| 85-89                   | 3,627.9                                 | 529    | 145.8                       | 25,437.1                                         | 2,617  | 102.9                       | 5.6 (5.4, 5.8)                                      | 6.6 (6.5, 6.7)                     | -1.0 (-1.2, -0.8)          |

<sup>a</sup> Difference calculated as (type 2 diabetes cohort life expectancy minus type 2 diabetes-free population life expectancy); negative values indicate lower life expectancy in type 2 diabetes cohort.

ESM Table 5

Abridged life table for men and women with type 2 diabetes vs. population of Scotland without type 2 diabetes; SIMD quintile 5 (least deprived), period 2012-2014

| age interval<br>(years) | observed data in type 2 diabetes cohort |        |                             | observed data in type 2 diabetes-free population |        |                             | estimated life expectancy (95% confidence interval) |                                    |                            |
|-------------------------|-----------------------------------------|--------|-----------------------------|--------------------------------------------------|--------|-----------------------------|-----------------------------------------------------|------------------------------------|----------------------------|
|                         | person-years                            | deaths | death rate<br>per 1,000 p-y | person-years                                     | deaths | death rate per<br>1,000 p-y | type 2 diabetes<br>cohort                           | type 2 diabetes-free<br>population | LE difference <sup>a</sup> |
| MEN                     |                                         |        |                             |                                                  |        |                             |                                                     |                                    |                            |
| 40-44                   | 1,453.8                                 | 4      | 2.8                         | 107,031.3                                        | 97     | 0.9                         | 38.7 (37.9, 39.5)                                   | 43.2 (43.0, 43.3)                  | -4.5 (-5.3, -3.7)          |
| 45-49                   | 2,942.3                                 | 17     | 5.8                         | 117,537.7                                        | 167    | 1.4                         | 34.2 (33.5, 34.8)                                   | 38.4 (38.2, 38.5)                  | -4.2 (-4.9, -3.5)          |
| 50-54                   | 5,082.7                                 | 32     | 6.3                         | 113,050.4                                        | 208    | 1.8                         | 30.1 (29.6, 30.6)                                   | 33.6 (33.4, 33.8)                  | -3.5 (-4.0, -3.0)          |
| 55-59                   | 7,407.3                                 | 39     | 5.3                         | 98,282.7                                         | 341    | 3.5                         | 26.0 (25.6, 26.4)                                   | 28.9 (28.7, 29.1)                  | -2.9 (-3.4, -2.4)          |
| 60-64                   | 9,381.4                                 | 112    | 11.9                        | 87,298.6                                         | 523    | 6.0                         | 21.6 (21.2, 22.0)                                   | 24.4 (24.2, 24.5)                  | -2.8 (-3.2, -2.4)          |
| 65-69                   | 10,859.8                                | 169    | 15.6                        | 77,699.3                                         | 778    | 10.0                        | 17.8 (17.5, 18.1)                                   | 20.0 (19.9, 20.2)                  | -2.2 (-2.6, -1.8)          |
| 70-74                   | 8,913.4                                 | 219    | 24.6                        | 51,644.6                                         | 935    | 18.1                        | 14.0 (13.7, 14.4)                                   | 15.9 (15.8, 16.1)                  | -1.9 (-2.2, -1.6)          |
| 75-79                   | 7,993.2                                 | 399    | 49.9                        | 40,364.8                                         | 1,298  | 32.2                        | 10.5 (10.3, 10.8)                                   | 12.2 (12.1, 12.3)                  | -1.7 (-2.0, -1.4)          |
| 80-84                   | 5,365.2                                 | 436    | 81.3                        | 26,791.8                                         | 1,692  | 63.2                        | 7.8 (7.6, 8.1)                                      | 8.9 (8.8, 9.0)                     | -1.1 (-1.4, -0.8)          |
| 85-89                   | 2,512.0                                 | 376    | 149.7                       | 14,055.0                                         | 1,633  | 116.2                       | 5.6 (5.3, 5.8)                                      | 6.3 (6.2, 6.4)                     | -0.7 (-1.0, -0.4)          |
| WOMEN                   |                                         |        |                             |                                                  |        |                             |                                                     |                                    |                            |
| 40-44                   | 824.0                                   | 2      | 2.4                         | 115,486.0                                        | 71     | 0.6                         | 40.4 (39.4, 41.4)                                   | 45.2 (45.1, 45.4)                  | -4.8 (-5.8, -3.8)          |
| 45-49                   | 1,593.1                                 | 6      | 3.8                         | 127,551.9                                        | 137    | 1.1                         | 35.8 (35.0, 36.7)                                   | 40.4 (40.2, 40.5)                  | -4.6 (-5.4, -3.8)          |
| 50-54                   | 2,721.8                                 | 12     | 4.4                         | 121,466.2                                        | 234    | 1.9                         | 31.5 (30.8, 32.1)                                   | 35.6 (35.4, 35.7)                  | -4.1 (-4.8, -3.4)          |
| 55-59                   | 3,925.6                                 | 25     | 6.4                         | 106,223.4                                        | 308    | 2.9                         | 27.1 (26.6, 27.7)                                   | 30.9 (30.7, 31.0)                  | -3.8 (-4.4, -3.2)          |
| 60-64                   | 5,063.7                                 | 45     | 8.9                         | 96,477.3                                         | 430    | 4.5                         | 22.9 (22.4, 23.4)                                   | 26.3 (26.2, 26.4)                  | -3.4 (-3.9, -2.9)          |
| 65-69                   | 6,549.7                                 | 88     | 13.4                        | 88,685.3                                         | 642    | 7.2                         | 18.9 (18.4, 19.3)                                   | 21.8 (21.7, 22.0)                  | -2.9 (-3.3, -2.5)          |
| 70-74                   | 6,346.5                                 | 140    | 22.1                        | 63,990.6                                         | 830    | 13.0                        | 15.0 (14.6, 15.4)                                   | 17.6 (17.4, 17.7)                  | -2.6 (-3.0, -2.2)          |
| 75-79                   | 6,470.5                                 | 264    | 40.8                        | 52,595.5                                         | 1,244  | 23.7                        | 11.4 (11.1, 11.8)                                   | 13.6 (13.4, 13.7)                  | -2.2 (-2.5, -1.9)          |
| 80-84                   | 5,294.5                                 | 405    | 76.5                        | 39,573.5                                         | 1,808  | 45.7                        | 8.5 (8.2, 8.8)                                      | 9.9 (9.8, 10.1)                    | -1.4 (-1.7, -1.1)          |
| 85-89                   | 2,933.7                                 | 371    | 126.5                       | 25,341.3                                         | 2,410  | 95.1                        | 6.3 (6.0, 6.6)                                      | 6.9 (6.8, 7.0)                     | -0.6 (-0.9, -0.3)          |

<sup>a</sup> Difference calculated as (type 2 diabetes cohort life expectancy minus type 2 diabetes-free population life expectancy); negative values indicate lower life expectancy in type 2 diabetes cohort.
